# Supplementary material
Source: ML conference proceedings conference paper supplement (https://openreview.net/forum?id=rlbz4_Io5g9)

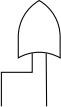

A

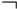

A

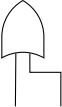

*B*

*-B*

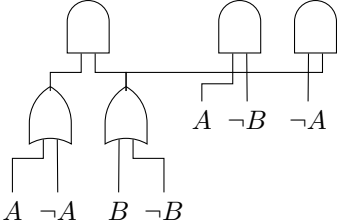

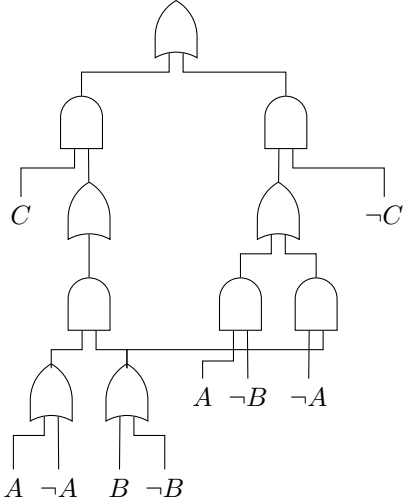

Supplement: supplementary_material [file attachment]
